# Supplementary material for: Opportunities and limitations of membrane-based preconcentration for rapid and continuous diagnostic applications
Source: Royal Society of Chemistry journal article supplement (doi:10.1039/d2sd00002d), 2022-01-01
Supplement: d2sd00002d1.pdf [file d2sd00002d1.pdf]

## Supplementary Material: Pneumatic Pressure-driven Device Concentration Data

PBS/Flu without swab

| Test # | Max Theoretical Precon. | Actual Precon. | % of Theoretical Achieved |
|--------|-------------------------|----------------|---------------------------|
| 1      | 50x                     | 10x            | 20                        |
| 2      | 21x                     | 0x             | 0                         |
| 3      | 37x                     | 10x            | 27                        |
| 4      | 22x                     | 8.5x           | 39                        |
| 5      | 15.5x                   | 7.6x           | 49                        |
| 6      | 16.7x                   | 15.7x          | 97                        |
| 7      | 16.7x                   | 3.3x           | 20                        |
| 8      | 12.5x                   | 5.2x           | 42                        |
| 9      | 6.8x                    | 1.8x           | 26                        |
| 10     | 22.2x                   | 3.2x           | 14                        |
| 11     | 11.8x                   | 9x             | 76                        |
| 12     | 16.7x                   | 2.24x          | 13                        |
| 13     | 40x                     | 10.4x          | 26                        |
| 14     | 40x                     | 12.8x          | 32                        |
|        |                         | Average        | 34.35714286               |
|        |                         | Std. Deviation | 25.74313095               |
|        |                         | Std. Error     | 6.880141149               |
|        |                         | Variance       | 615.372449                |

PBS/Flu with Swab

| Test # | Max Theoretical Precon. | Actual Precon. | % of Theoretical Achieved |
|--------|-------------------------|----------------|---------------------------|
| 1      | 25x                     | 25x            | 100                       |
| 2      | 66.7x                   | 49.6x          | 74                        |
| 3      | 40x                     | 19.1x          | 48                        |
| 4      | 22x                     | 19.8x          | 90                        |
| 5      | 100x                    | 61x            | 61                        |
| 6      | 33x                     | 33x            | 100                       |
| 7      | 27x                     | 19x            | 70                        |
| 8      | 100x                    | 77x            | 77                        |
| 9      | 100x                    | 42x            | 42                        |
| 10     | 8x                      | 6x             | 75                        |
| 11     | 57x                     | 47x            | 82                        |
| 12     | 19x                     | 10x            | 53                        |
| 13     | 50x                     | 36x            | 72                        |
| 14     | 20x                     | 20x            | 100                       |
| 15     | 22x                     | 21x            | 95                        |
| 16     | 40x                     | 40x            | 100                       |
| 17     | 27x                     | 13x            | 48                        |
| 18     | 29x                     | 16x            | 55                        |
| 19     | 40x                     | 40x            | 100                       |
|        |                         | Average        | 75.89473684               |
|        |                         | Std. Deviation | 20.34397191               |
|        |                         | Std. Error     | 4.667227245               |
|        |                         | Variance       | 392.0941828               |

Urine/HCG with Swab

| Test # | Max. Theoretical Precon | Actual Precon. | % of Theoretical Achieved |
|--------|-------------------------|----------------|---------------------------|
| 1      | 100x                    | 40x            | 40                        |
| 2      | 111x                    | 35x            | 32                        |
| 3      | 250x                    | 124x           | 50                        |
| 4      | 91x                     | 40x            | 44                        |
| 5      | 63x                     | 42x            | 67                        |
| 6      | 47x                     | 16x            | 34                        |
| 7      | 100x                    | 45x            | 45                        |
| 8      | 143x                    | 66x            | 46                        |
| 9      | 91x                     | 48x            | 53                        |
| 10     | 182x                    | 102x           | 56                        |
| 11     | 125x                    | 59x            | 47                        |
| 12     | 333x                    | 109x           | 33                        |
| 13     | 400x                    | 165x           | 41                        |
| 14     | 190x                    | 95x            | 50                        |
| 15     | 86x                     | 77x            | 90                        |
| 16     | 91x                     | 39x            | 43                        |
| 17     | 125x                    | 75x            | 60                        |
| 18     | 100x                    | 59x            | 59                        |
|        |                         | Average        | 49.44444444               |
|        |                         | Std. Deviation | 13.92087819               |
|        |                         | Std. Error     | 3.281182457               |
|        |                         | Variance       | 183.0246914               |
